# Supplementary material for: SiO2-assisted synthesis of layered MoS2/reduced graphene oxide intercalation composites as high performance anode materials for Li-ion batteries
Source: Royal Society of Chemistry journal article supplement (doi:10.1039/c6ra15944c), 2016-01-01
Supplement: c6ra15944c1.pdf [file c6ra15944c1.pdf]

## Supporting Information

### **SiO<sub>2</sub>-assisted synthesis of layered MoS<sub>2</sub>/reduced graphene oxide intercalation composites as high performance anode materials for Li-ion batteries**

Nguyen Tronganh <sup>a,c</sup>, Yaqing Yang <sup>a</sup>, Fang Chen <sup>a</sup>, Mengna Lu <sup>a</sup>, Yong Jiang <sup>a,\*</sup>,

Yang Gao <sup>b</sup>, Lingli Cheng <sup>b</sup>, Zheng Jiao <sup>b,\*</sup>

<sup>a</sup> School of Environmental and Chemical Engineering, Shanghai University, Shanghai 200444, P.R. China.

<sup>b</sup> Shanghai Applied Radiation Institute, Shanghai University, Shanghai 201800, P.R. China

<sup>c</sup> Faculty of Chemical and Environmental Engineering, Lac Hong University, Bienhoa, Dongnai 810000, Vietnam

\* Correspondence author. E-mail address: [jiangyong@shu.edu.cn](mailto:jiangyong@shu.edu.cn) (Y. Jiang); Tel.: +86 21 66137508.

\*\* Correspondence author. E-mail address: [zjiao@shu.edu.cn](mailto:zjiao@shu.edu.cn) (Z. Jiao); Tel.: +86 21 66135160.

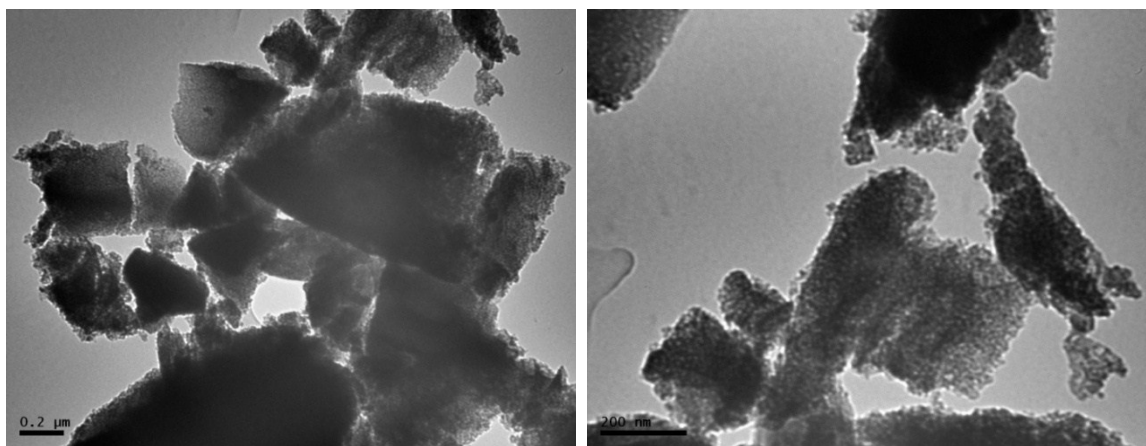

**Fig. S1** TEM images of SiO<sub>2</sub> template.

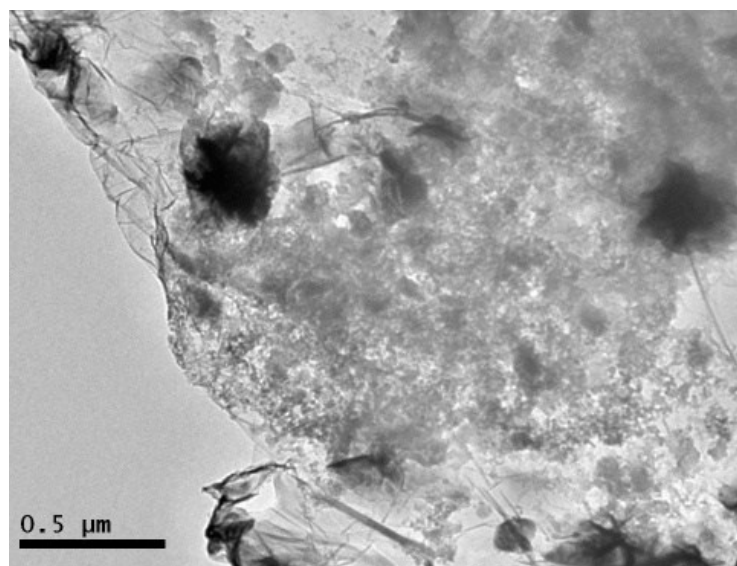

**Fig. S2** TEM image of MoS<sub>2</sub>/rGO-0.5 composite before leaching of the SiO<sub>2</sub>.

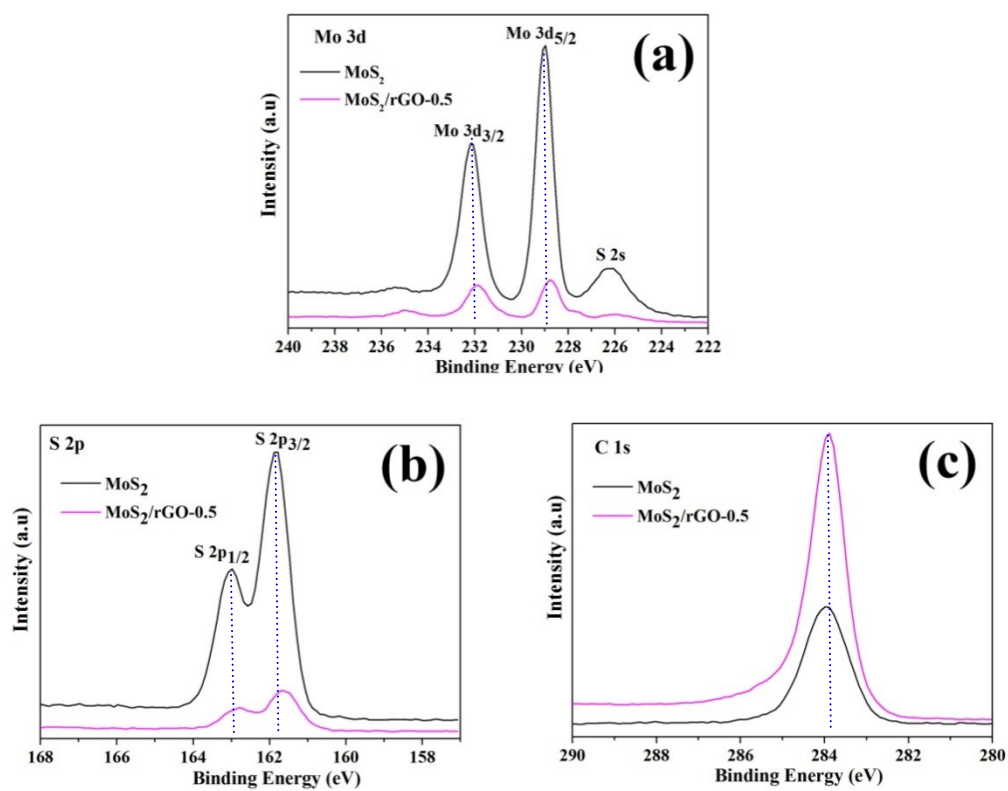

**Fig. S3** XPS spectra of (a) Mo 3d, (b) S 2p and (c) C 1s electrons of the pure MoS<sub>2</sub> and MoS<sub>2</sub>/rGO-0.5 composite.
